# Supplementary material
Source: MDPI journal article supplement (https://www.mdpi.com/2571-841X/6/1/15)
Supplement: s1 [file s1]

| SAMPLE DETAILS       |                         |
|----------------------|-------------------------|
| Heart Rate           | 42 BPM                  |
| Date                 | 30 Dec 2020 at 18:32:33 |
| Source               | Apple Watch di Luca     |
| Date Added to Health | 30 Dec 2020 at 18:34:32 |
| Heart Rate Context   | Sedentary               |
| DEVICE DETAILS       |                         |
| Name                 | Apple Watch             |
| Manufacturer         | Apple Inc.              |
| Model                | Watch                   |
| Hardware Version     | Watch4,1                |

| SAMPLE DETAILS       |                         |
|----------------------|-------------------------|
| Start Time           | 30 Dec 2020 at 18:33:52 |
| End Time             | 30 Dec 2020 at 18:34:22 |
| Source               | ECG                     |
| Date Added to Health | 30 Dec 2020 at 18:34:23 |
| Algorithm Version    | 1                       |
| DEVICE DETAILS       |                         |
| Name                 | Apple Watch             |
| Manufacturer         | Apple Inc.              |
| Model                | Watch                   |
| Hardware Version     | Watch4,1                |

Figure S1: Apple Health app data showing sinus bradycardia (left screenshot) followed by ECG recording (right screenshot).
